# Supplementary material for: The effects of playing music on mental health outcomes
Source: PubMed Central journal article supplement (PMC6717192; doi:10.1038/s41598-019-49099-9), 2019-08-30

**The effects of playing music on mental health outcomes**  
**Laura W. Wesseldijk, Fredrik Ullén, Miriam A. Mosing**  
**Supplementary material**

**Table S1.** Music engagement and the registry-based mental health outcomes, including education and sex as covariates.

|                          | <b>Hazard ratio (confidence intervals)</b> |                              |                       |                         |
|--------------------------|--------------------------------------------|------------------------------|-----------------------|-------------------------|
|                          | Never played vs. played but stopped        | Never played vs. still plays | Education             | Sex                     |
| Any psychiatric disorder | 0.88 (.72-1.08)                            | 1.09 (.87-1.36)              | <b>0.77 (.64-.91)</b> | <b>1.77 (1.47-2.13)</b> |
| Depression               | 0.91 (.69-1.19)                            | 1.16 (.87-1.56)              | <b>0.73 (.58-.92)</b> | <b>2.03 (1.59-2.59)</b> |
| Anxiety                  | 0.95 (.70-1.29)                            | <b>1.39 (1.01-1.92)</b>      | <b>0.59 (.46-.75)</b> | <b>2.03 (1.53-2.68)</b> |
| Schizophrenia            | 1.59 (.52-4.88)                            | 2.42 (.78-7.43)              | <b>0.27 (.09-.77)</b> | 0.61 (.25-1.49)         |
| Bipolar                  | 1.23 (.63-2.37)                            | 1.79 (.92-3.48)              | <b>0.57 (.34-.94)</b> | 1.40 (.82-2.39)         |
| Stress-related           | 0.91 (.64-1.30)                            | 1.00 (.69-1.47)              | 0.89 (.67-1.18)       | <b>1.67 (1.21-2.28)</b> |

**Table S2.** Music achievement and the registry-based mental health outcomes. Education and sex are included as covariates, but not reported in this table, see for their effects Table S1.

|                          | <b>Hazard ratio (confidence intervals)</b> |                                              |                                   |
|--------------------------|--------------------------------------------|----------------------------------------------|-----------------------------------|
|                          | Professional musicians vs. non-players     | Professional musicians vs. amateur musicians | Amateur musicians vs. non-players |
| Any psychiatric disorder | .95 (.63-1.45)                             | .84 (.54-1.28)                               | 1.17 (.96-1.41)                   |
| Depression               | .77 (.42-1.40)                             | .66 (.36-1.22)                               | 1.21 (.95-1.54)                   |
| Anxiety                  | 1.37 (.79-2.34)                            | 1.01 (.57-1.77)                              | 1.32 (.99-1.73)                   |
| Schizophrenia            | -                                          | -                                            | 1.76 (.70-4.40)                   |
| Bipolar                  | 1.73 (.46-6.46)                            | 1.56 (.40-6.00)                              | 1.38 (.77-2.46)                   |
| Stress-related           | 1.27 (.67-2.40)                            | 1.11 (.58-2.13)                              | 1.20 (.86-1.67)                   |

**Figure S1.** Sensitivity analyses of the effect of sport on the registry-based mental health outcomes.

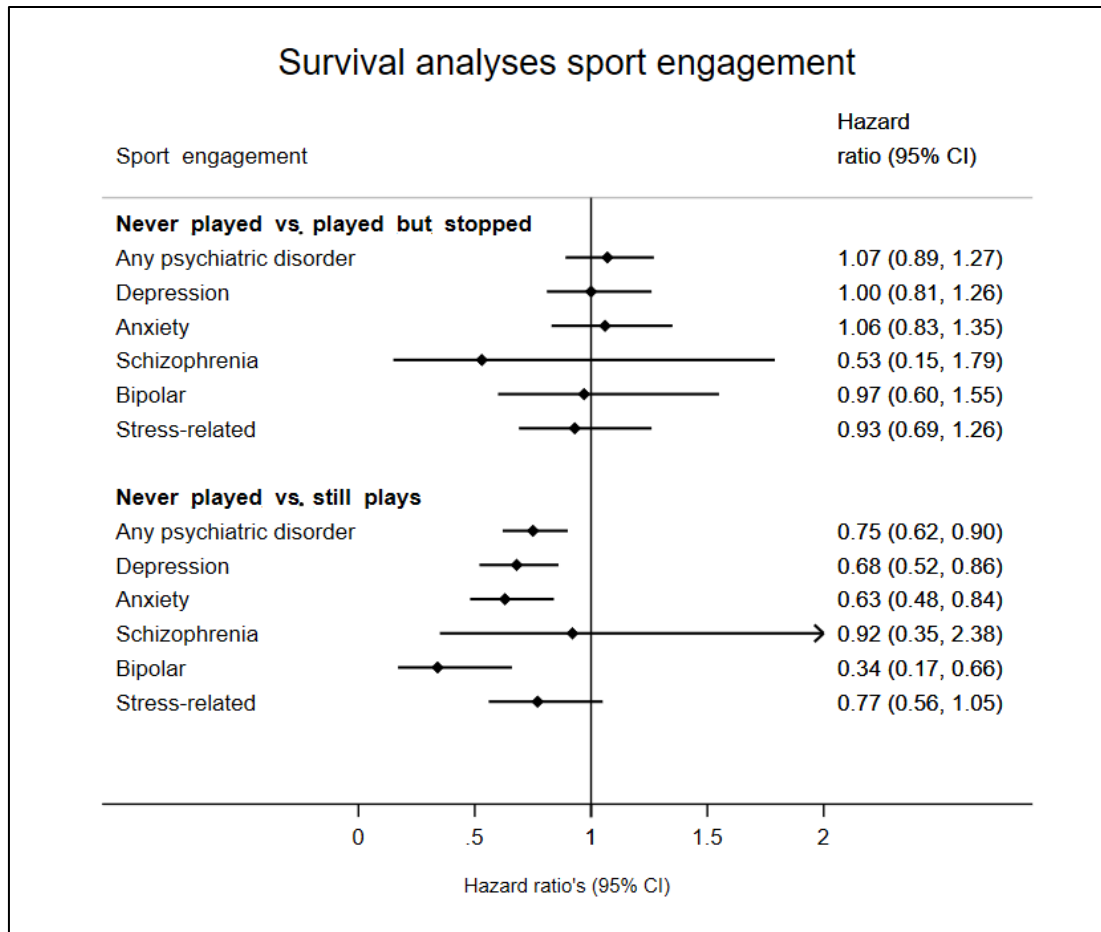

Supplement: 41598_2019_49099_MOESM1_ESM.pdf [file 41598_2019_49099_MOESM1_ESM.pdf]
